# Supplementary material for: Macrocyclization strategies for cyclic peptides and peptidomimetics
Source: PubMed Central journal article supplement (PMC8372203; doi:10.1039/d1md00083g), 2021-06-29
Supplement: MD-012-D1MD00083G-s001.pdf [file MD-012-D1MD00083G-s001.pdf]

## Macrocyclization strategies for cyclic peptides and peptidomimetics

Clément Bechtler<sup>a</sup> and Christina Lamers<sup>a\*</sup>

Department Pharmaceutical Sciences, University of Basel, Klingelbergstr. 50, 4056 Basel, Switzerland.

**Supplementary Table S1:** Commonly used macrocyclization reactions for peptides. The required reaction partners are listed as well as if they have been reported to work successfully on-resin, in solution, in a chemoselective way or on unprotected peptides, a green tick signifying it has been reported, a red cross that it has not been reported.

| Required functional groups:     |                                    |                                                      |                                                                               |          |             |                |             |                                                                                                  |
|---------------------------------|------------------------------------|------------------------------------------------------|-------------------------------------------------------------------------------|----------|-------------|----------------|-------------|--------------------------------------------------------------------------------------------------|
| Bond or functional group formed | Reaction partner I (N-terminus)    | Reaction partner II (C-terminus)                     | Reaction                                                                      | On-resin | In solution | Chemoselective | Unprotected | Comments                                                                                         |
| Amide                           | H <sub>2</sub> N-                  | -COOH                                                | Amide coupling                                                                | ✓        | ✓           | ⊘              | ✓           |                                                                                                  |
|                                 | HNCys-                             | -COSR                                                | NCL                                                                           | ✓        | ✓           | ✓              | ✓           |                                                                                                  |
|                                 | HNAIa-                             | -COSR                                                | NCL + desulfurisation                                                         | ✓        | ✓           | ✓              | ✓           |                                                                                                  |
|                                 | H <sub>2</sub> N-                  | -COSR                                                | aminolysis                                                                    | ⊘        | ✓           | ✓              | Lys         | Other lysine needs to be protected                                                               |
|                                 | H <sub>2</sub> N-                  | -COO-Sanger                                          | aminolysis                                                                    | ⊘        | ✓           | ✓              | Lys         | Other lysine needs to be protected                                                               |
|                                 | H <sub>2</sub> N-                  | -COO-Dbz                                             | aminolysis                                                                    | ✓        | ✓           | ✓              | ⊘           |                                                                                                  |
|                                 | N <sub>3</sub> CH <sub>2</sub> NH- | -COSCH <sub>2</sub> PPh <sub>2</sub>                 | Staudinger                                                                    | ⊘        | ✓           | ✓              | ⊘           |                                                                                                  |
|                                 | 2-amino thioamide-                 | -COOH                                                | Ag-promoted lactamisation                                                     | ✓        | ✓           | ✓              | ✓           |                                                                                                  |
|                                 | HNCys-                             | -glycolaldehyde                                      | Thiazolidine formation                                                        | ⊘        | ✓           | ✓              | ⊘           | Or sidechain aldehyde                                                                            |
|                                 | RONH-                              | -Ketoacide                                           | KAHA                                                                          | ⊘        | ✓           | ✓              | ⊘           | Mild conditions                                                                                  |
|                                 | 5-oxaproline-                      | -Ketoacide                                           | KAHA II                                                                       | ⊘        | ✓           | ✓              | ⊘           | Introduces homoserine, epimerization                                                             |
|                                 | HNSer/Thr-                         | -COO-salicylaldehyde                                 | Ser/Thr ligation                                                              | ✓        | ✓           |                | ⊘           |                                                                                                  |
|                                 | H <sub>2</sub> N-                  | -COOH                                                | Lactam formation, subsequent O-to-N transfer                                  |          | ✓           |                | ⊘           | Depsipeptide mediated                                                                            |
|                                 | 2-OH-6-NO <sub>2</sub> -benzyl-NH- | -COOH                                                | Lacton formation and O-to-N migration                                         |          | ✓           |                |             |                                                                                                  |
|                                 | H <sub>2</sub> N-COOH              | <i>tert</i> -butyl-isocyanide and aziridine aldehyde | MCR, disrupted Ugi                                                            | ✓        | ✓           | ⊘              | ⊘           |                                                                                                  |
| N-substituted amide             | COOH, -NH <sub>2</sub> , -CHO, -NC | -                                                    | MCR, Ugi                                                                      |          | ✓           | ⊘              | ⊘           |                                                                                                  |
| Amine                           | H <sub>2</sub> N-nitrotyrosine     | -CHO, -NC                                            | MCR, Ugi-Smiles                                                               | ✓        | ✓           | ⊘              | ⊘           |                                                                                                  |
|                                 | -NH <sub>2</sub> (Lys)             | Diborono-benzene scaffold                            | Petasis reaction stapling                                                     | ✓        | ✓           | ⊘              | ⊘           |                                                                                                  |
| Imine to amine                  | H <sub>2</sub> N-                  | -CHO                                                 | Trapping imine: CN <sup>-</sup> Strecker<br>Reduction with BH <sub>3</sub> CN |          | ✓           | ✓              |             |                                                                                                  |
|                                 | H <sub>2</sub> NTrp/His-           | -CHO                                                 | Trapping imine Pictet-Spengler                                                |          | ✓           | ✓              |             |                                                                                                  |
|                                 | H <sub>2</sub> N-                  | -CHO                                                 | Intramolecular 4-imidazolidinone formation                                    |          | ✓           | ✓              |             | CyClick                                                                                          |
|                                 | NH <sub>2</sub> -Gly-              | Carboxybenzaldehyde on sidechain                     | Trapping imine with dipolarophiles                                            | ✓        |             | ✓              |             |                                                                                                  |
|                                 | NH <sub>2</sub> (Lys)              | HCHO                                                 | Trapping with Trp or Arg                                                      |          | ✓           | ✓              |             |                                                                                                  |
| Imine                           | H <sub>2</sub> N-                  | -CHO                                                 | Trapping imine as iminoboronate                                               |          | ✓           | ✓              |             | Introduction of non-natural amino acid; reversible upon stimuli (pH, oxidation, small molecules) |
| Imine to pyrrole                | NH <sub>2</sub> (Lys)              | Furan to diketoene                                   | Ketoenal formation                                                            |          | ✓           | ✓              |             |                                                                                                  |
| Oxime                           | hydroxylamine                      | aldehyde                                             | oxime                                                                         |          | ✓           | ✓              |             | E- and Z-isomer                                                                                  |
| -S-S-                           | Thiol                              | Thiol                                                | oxidation                                                                     | ✓        | ✓           | ✓              |             |                                                                                                  |
| -S-CH <sub>2</sub> -S-          | Thiol                              | Thiol                                                | Methylene thioacetal formation                                                | ⊘        | ✓           | ✓              | ✓           |                                                                                                  |
| -S-                             | Thiol                              | Bromo/chloroacetate                                  | Attached to Lys-sidechain or N-terminal amino group                           | ✓        | ✓           | ✓              | ✓           | Primary amines have to be protected; can be applied on in vitro techniques                       |
|                                 | Thiol                              | alkene                                               | Thiol-ene                                                                     | ✓        | ✓           | ✓              | ✓           | Alkene as acryloyl, compatible on phage                                                          |

|                                   |                     |                            |                                      |   |   |   |   |                                                                          |
|-----------------------------------|---------------------|----------------------------|--------------------------------------|---|---|---|---|--------------------------------------------------------------------------|
|                                   | Thiol               | alkene                     | Radical thiol-ene                    | ✓ | ✓ | ✓ |   | Alkene as allyloxy PG or non-natural AA                                  |
|                                   | Thiol               | alkyne                     | Radical thiol-yne                    |   | ✓ | ✓ |   | Generates E- and Z- isomer                                               |
|                                   | Thiol               | DHA                        | Michael-addition                     | ✓ | ✓ | ✓ |   |                                                                          |
|                                   | Thiol               | scaffolds                  |                                      | ✓ | ✓ | ✓ |   |                                                                          |
| <b>C-O</b>                        | Alcohol             | Aryl boronic acid          | Evans-Chan-Lam coupling              | ? | ✓ | ✓ | ? | Also for aryl amines or aryl thioethers                                  |
|                                   | Alcohol             | Carbonate                  | Tsuji-Trost reaction                 | ? | ✓ | ✓ | ✓ |                                                                          |
|                                   | Alcohol             | Aryl bromide               | Metal-photoredox-catalysed reactions | ? | ✓ | ✓ | ? |                                                                          |
| <b>C-C</b>                        | Organometal, alkene | Halide                     | Traditional cross coupling           | ✓ | ✓ | ✓ | ? | Suzuki couplings on unprotected peptides reported, but usually protected |
|                                   | Alkene, allyl, aryl | Aryl, aryl halide          | CH activation – cross coupling       | ? | ✓ | ✓ | ? |                                                                          |
|                                   | Acrylate            | C-terminal carboxylic acid | Ir-photocatalysed reaction           | ? | ✓ | ✓ | ✓ |                                                                          |
|                                   | Alkyne              | Alkyne                     | Glaser-Hay coupling                  | ✓ | ✓ | ✓ | ? |                                                                          |
| <b>C=C</b>                        | Alkene              | Alkene                     | RCM                                  | ✓ | ✓ | ✓ | ✓ | Also suitable for DNA-encoded libraries                                  |
| <b>C≡C</b>                        | Alkyne              | Alkyne                     | RCAM                                 | ✓ | ✓ | ✓ | ? |                                                                          |
| <b>1,4-Disubstituted triazole</b> | Alkyne              | Azide                      | CuAAC                                | ✓ | ✓ | ✓ | ✓ |                                                                          |
| <b>1,5-Disubstituted triazole</b> | Alkyne              | Azide                      | RuAAC                                | ✓ | ✓ | ✓ | ? |                                                                          |
| <b>1,5-Disubstituted triazole</b> | Alkyne              | Azide                      | Metal-free Dipolar cycloaddition     | ✓ | ? | ✓ | ? |                                                                          |

**Supplementary Table S2:** Selection of examples in which peptide macrocyclizations were used to improve biological properties of peptides. AT<sub>2</sub> = Angiotensin II receptor type 2, AT<sub>1</sub> = Angiotensin II receptor type 1, OXTR = oxytocin receptor, IR = insulin receptor, pAkt = phosphorylated Akt, eIF4E = eukaryotic translation initiation factor 4E, UTR = urotensin II receptor.

| Functional group or bond formed | Reaction                                                   | Aim                                  | Change of                              | Target                                                          | Result                                                                            | Comment                                                                                                   | Reference |
|---------------------------------|------------------------------------------------------------|--------------------------------------|----------------------------------------|-----------------------------------------------------------------|-----------------------------------------------------------------------------------|-----------------------------------------------------------------------------------------------------------|-----------|
| Lactam                          | Lactam coupling head-to-tail                               | β-hairpin as smaller α-helix mimetic | Secondary structure (α-helix)          | p53-HDM2                                                        | IC <sub>50</sub> 0.53 μM (8 AA β-hairpin) vs 1.1 μM (15 AA α-helix)               |                                                                                                           | 1         |
|                                 | Lactam sidechain-to-sidechain                              | Smallest α-helix (pentapeptide)      |                                        |                                                                 | Induction of α-helix in water                                                     |                                                                                                           | 2         |
|                                 | NCL                                                        | Improve proteolytic stability        | Free N- and C-terminus                 | α-conotoxin MII derivatives on nicotinic acetylcholine receptor | Improved proteolytic stability (20%)                                              | Preserve full activity (1.3 μM)                                                                           | 3         |
|                                 | Aldehyde + N-term. Cys                                     | Synthesis natural compound           |                                        | Lugdunin                                                        | S. aureus MIC 1.5 μg/mL                                                           |                                                                                                           | 4         |
|                                 | Serine ligation                                            | Synthesis natural compound           |                                        | Daptomycin                                                      | First total synthesis                                                             |                                                                                                           | 5         |
|                                 | Scaffold                                                   | PPI                                  | Linear peptide                         | TNFα:TNFα receptor                                              | 3.1 μM (ELISA)<br>K <sub>D</sub> 0.45 μM                                          | scaffold essential for affinity (KD >10 μM)                                                               | 6         |
| Oxime                           |                                                            | Affinity and proteolytic stability   | Linear peptide                         | p53 HDM2/X                                                      | IC <sub>50</sub> HDM2 110 nM; HDMX 340 nM (linear: 1.5 μM; 7.5 μM)                | 10- to 15- fold higher stability, 40% higher helicity                                                     | 7         |
| Disulfide                       | Oxidation of Cysteines                                     |                                      | Linear vs lactam vs disulfide cyclized | ERα                                                             | K <sub>i</sub> 0.17 μM vs 0.22 μM vs 0.025 μM                                     | Stabilized helicity                                                                                       | 8         |
| Thioacetal                      | TBAF-mediated thioacetalization                            | Selectivity                          | Linear peptide                         | AT <sub>2</sub>                                                 | selectivity over AT <sub>1</sub> increased from 0.5-fold to 10-fold               | Change of affinity strongly dependent on linker length;                                                   | 9         |
|                                 | CH <sub>2</sub> I <sub>2</sub> -mediated thioacetalization |                                      | Disulfide                              | OXTR                                                            | 6-fold decrease in affinity                                                       | only weak decrease in affinity, serum stability increased 2.5-fold                                        | 10        |
|                                 | CH <sub>2</sub> I <sub>2</sub> -mediated thioacetalization | Affinity and serum stability         | Disulfide                              | IR                                                              | 2-fold decrease in pAkt signalling, but strongly increased serum stability        |                                                                                                           | 11        |
| Thioether                       | Scaffold                                                   | Activity, helicity                   | Linear vs stapled peptide              | Mdm2/Mdmx                                                       | Mdm2: IC <sub>50</sub> 57 nM vs 5.4 nM<br>Mdmx: IC <sub>50</sub> 1800 nM vs 14 nM | Increased cell permeability of stapled peptides                                                           | 12        |
|                                 | Photo controllable scaffold                                | Activity, helicity                   | Linear vs trans vs cis                 | Bcl-xl                                                          | K <sub>D</sub> 134 nM vs 825 nM vs 42 nM                                          | Opportunity to activate apoptotic process under light control                                             | 13        |
| C-C single bond                 | C(sp <sup>3</sup> )-H activation-mediated macrocyclization | Binding, stability                   | Linear peptide                         | Integrins                                                       | >100-fold increased proteolytic stability                                         | When applied to RGD-containing peptides: binding to αvβ3 integrin-overexpressing cells strongly increased | 14)       |
| Alkene                          | RCM                                                        | Affinity                             | Linear peptide                         | eIF4E                                                           | 6-fold increase in affinity                                                       | Affinity dependent on ring size                                                                           | 15        |
|                                 | RCM                                                        | Activity, stability                  | Linear peptide                         | Bcl-xl                                                          | K <sub>D</sub> 154 nM vs 69 nM; stability 60 fold improved                        | intramolecular H-bond mimetic                                                                             | 16        |
|                                 | RCM                                                        | Affinity, helicity                   | Linear peptide                         | p53 MDM2/X                                                      | K <sub>i</sub> (MDM2) 14 nM vs 1 nM,<br>K <sub>i</sub> (MDX) 47 nM vs 7 nM        |                                                                                                           | 17        |

|                                   |       |                                        |                |                       |                                                                                                            |                                                         |    |
|-----------------------------------|-------|----------------------------------------|----------------|-----------------------|------------------------------------------------------------------------------------------------------------|---------------------------------------------------------|----|
|                                   |       | Insulin Activity                       | Disulfide      | IR                    | Cis-Isomer showed increased efficacy in mice compared to native insulin                                    | Binding of trans-isomer to IR (A and B) 50-fold reduced | 18 |
| Alkyne                            | RCAM  | Affinity                               | Linear peptide | Rab8a                 | >10-fold increase in affinity                                                                              | Affinity strongly dependent on linker length            | 19 |
| 1,4-substituted<br>1,2,3-triazole | CuAAC | Affinity, helicity                     | Linear peptide | BCL9 $\beta$ -catenin | K <sub>i</sub> 0.6 $\mu$ M vs 0.13 $\mu$ M;<br>Helicity 44% vs 90%                                         | improved stability                                      | 20 |
|                                   | CuAAC | Activity                               | Disulfide      |                       | Equipotent as the disulfide in rat model for neuropathic pain                                              | Drastically increased plasma stability                  | 21 |
| 1,5-substituted<br>1,2,3-triazole | RuAAC | Affinity                               | Disulfide      | UTR                   | Maintained affinity                                                                                        | 1,4-substituted triazole analogues lost affinity        | 22 |
|                                   | RuAAC | Inhibitory activity, hepatic stability | Disulfide      | Set of proteases      | Reduced inhibition 5-100-fold compared to disulfide; hepatic stability of triazoles increased >2 - >6-fold |                                                         | 23 |

**Supplementary Table S3:** Example reaction conditions used for in solution RCM for peptides. stochi. = stoichiometric, TCE = 1,1,2-trichloroethane, TFE = 1,1,1-trifluoroethanol, rt = room temperature

| Substrate conc. | Catalyst          | Catalyst loading | Solvent           | T (°C)         | other conditions | t       | Yields                                                | workup                            | Comment                                                     | Ref. |
|-----------------|-------------------|------------------|-------------------|----------------|------------------|---------|-------------------------------------------------------|-----------------------------------|-------------------------------------------------------------|------|
| 5 mM            | Grubbs I          | 20%              | CHCl <sub>3</sub> | 25 °C          |                  | 3 -4 h  | 85-90%                                                |                                   |                                                             | 24   |
| 5 mM            | Hoveyda-Grubbs I  | 2.50%            | DCM               | 40 °C          |                  | 20 h    | 85%                                                   |                                   |                                                             | 25   |
| 10 mM           | Hoveyda-Grubbs I  | 5%               | DCM               | 40 °C (reflux) |                  | 24 h    | 87%                                                   |                                   |                                                             | 26   |
| 2.5 mM          | Grubbs II         | stochi.          | TCE/DMF           |                |                  |         | 67%                                                   |                                   |                                                             | 27   |
| 7 mM            | Grubbs I          | 20%              | DCM               | rt             | dry, degassed    | 48 h    | 40%                                                   |                                   |                                                             | 28   |
| 0.6 mM          | Grubbs II         | 10%              | DCM               | reflux         | dry              | 24 h    | 9% (overall: SPPS, cleavage, macrolactamization, RCM) | Removed solvent                   | Gave specifically cis alkene                                | 29   |
| 4 mM            | Grubbs II         | 15-20%           | DCM               | rt             |                  | 6-7.5 h | 42-52%                                                |                                   | Catalyst added in two portions, second portion after 2- 3 h | 30   |
| 10 mM           | Hoveyda-Grubbs II | 20%              | TFE/DCM (4:1)     | rt             |                  | 48 h    | 20-30%                                                | Removed solvent, purified by HPLC |                                                             | 31   |

**Supplementary Table S4:** Example reaction conditions used for on resin RCM for peptides. † = nominal concentration (resin loading/solvent volume), DCE = 1,2-dichloroethane, TCE = 1,1,2-trichloroethane, rt = room temperature,  $\mu$ W = microwave, \* = not specified which generation.

| Substrate conc.† | Catalyst          | Catalyst loading | Additives (eq)               | Solvent                | T (°C)        | Other conditions     | t         | Yields                             | Workup                                                                 | Comment                                                                                                                     | Ref. |
|------------------|-------------------|------------------|------------------------------|------------------------|---------------|----------------------|-----------|------------------------------------|------------------------------------------------------------------------|-----------------------------------------------------------------------------------------------------------------------------|------|
|                  | Grubbs II         | 15%              |                              | DCM                    | 100 °C        |                      | 75 min    |                                    |                                                                        |                                                                                                                             | 32   |
| 82 mM            | Hoveyda-Grubbs II | 20%              |                              | DCM                    | 100 °C        | $\mu$ W (300 W)      | 1 h       | 29%                                |                                                                        | Was essential to change from chlorotriyl to HMBA resin                                                                      | 33   |
|                  | Hoveyda-Grubbs II | 15%              |                              | DCM/DMF                | 100 °C        | $\mu$ W (120 W)      | 2 h       | 7 - 16%                            |                                                                        |                                                                                                                             | 34   |
| 5.5 mM           | Grubbs II         | 18%              | 2,6-Dichlorotoluene (3.6 eq) | TCE                    | reflux        | N <sub>2</sub>       | 16 h      | 45                                 |                                                                        | Mixture of E/Z (9%/37%)                                                                                                     | 35   |
| 33.3 mM          | Hoveyda-Grubbs*   | 200 g/mol (x2)   |                              | TCE                    | 50 °C         |                      | overnight |                                    |                                                                        |                                                                                                                             | 36   |
| 13 mM            | Grubbs I          | 40%              |                              | DCM                    | rt            | Ar                   | 48 h      |                                    |                                                                        |                                                                                                                             | 37   |
| 24 mM            | Grubbs II         | 20%              | LiCl (0.8 eq.)               | DCM/DMF (95/5)         | 100 °C        | $\mu$ W (100 W)      | 2 h       | 95%                                |                                                                        | RCM was unsuccessful on full length peptide, needed to be done on truncated version which was afterwards elongated, 3:1 E:Z | 38   |
| 33.3 mM          | Grubbs II         | 10%              | LiCl (4 eq.)                 | DCM:DMF (4:1)          | 40 °C, reflux | dry, degassed        | 48 h      | 22% (overall: SPPS, RCM, cleavage) | Washed with DMSO for 12 h after RCM, filtration, washed with DCM, MeOH |                                                                                                                             | 29   |
|                  | Hoveyda-Grubbs II |                  |                              | DCE                    | 50 °C         |                      | 8 h       |                                    | Washed with DMF, DCM                                                   |                                                                                                                             | 17   |
|                  | Grubbs II         | 20%              | LiCl                         | DCM                    | 100 °C        | $\mu$ W (60 W)       | 1 h       |                                    |                                                                        |                                                                                                                             | 39   |
| 24 mM            | Grubbs II         | 20%              | LiCl (0.8)                   | DCM:DMF (19:1 or 20:1) | 100 °C        | $\mu$ W (80 - 100 W) | 1 - 2 h   | 100%                               |                                                                        |                                                                                                                             | 40   |
|                  | Hoveyda-Grubbs II | 30%              |                              | DCM:DMF (4:1)          | 100 °C        | $\mu$ W (100 W)      | 2 h       | 26% (crude)                        |                                                                        |                                                                                                                             | 41   |
|                  | Hoveyda-Grubbs II | 20-35%           |                              | TFE:DCM (4:1)          | rt            |                      | 48 h      | 20-30% (overall, conversion > 90%) | Wash with DMSO:DMF (1:1) overnight                                     | Reaction on Novapeg resin required only 20% catalyst, on Wang resin 35%                                                     | 31   |

**Supplementary Table S5:** Example reaction conditions used for solution CuAAC for peptides. TFE = 1,1,1-trifluoroethanol, TBTA = tris[(1-benzyl-1*H*-1,2,3-triazol-4-yl)methyl]amine, THPTA = tris(3-hydroxypropyltriazolymethyl)amine, rt = room temperature.

| Substrate conc. | Cu salt (eq)                                    | Ascorbate (eq) | Additives (eq)                     | Solvent                                                    | T      | Other conditions          | time         | Yield  | Workup                                           | Comment                                    | Ref.  |
|-----------------|-------------------------------------------------|----------------|------------------------------------|------------------------------------------------------------|--------|---------------------------|--------------|--------|--------------------------------------------------|--------------------------------------------|-------|
| 1 mM            | CuSO <sub>4</sub> x 5 H <sub>2</sub> O (3)      | 6              |                                    | NH <sub>4</sub> CO <sub>3</sub> buffer (0.1 M)             | rt     | Ar                        | 30 min       |        | pH 2 (TFA), SPE (C18)                            |                                            | 42    |
| 1.2 M (!)       | CuBr (1)                                        | -              | DBU (3)                            | DCM                                                        | rt     | dry, N <sub>2</sub>       | 12 h         |        | Washed with 3 M HCl, extracted with DCM          |                                            | 43    |
| 0.775 mM        | CuSO <sub>4</sub> x 5 H <sub>2</sub> O (14)     | Large excess   |                                    | H <sub>2</sub> O:tBuOH (2:1)                               | rt     |                           | Overnight    |        | Concentrated, lyophilise, C18 HPLC               |                                            | 44    |
| 0.5 mM          | CuSO <sub>4</sub> x 5 H <sub>2</sub> O (14)     | 13             |                                    | H <sub>2</sub> O:tBuOH (2:1)                               | rt     |                           | 1 h          |        | HPLC (C12)                                       |                                            | 45    |
| 0.954 mM        | CuSO <sub>4</sub> x 5 H <sub>2</sub> O (8.4)    | 8.45           |                                    | H <sub>2</sub> O:tBuOH (2:1)                               | rt     |                           | overnight    |        | Concentrated, lyophilise, C18 HPLC (SPE)         |                                            | 46    |
| 1 mM            | CuBr (0.2)                                      | -              | DBU (3)                            | PhCH <sub>3</sub>                                          | 110 °C |                           | 16 h         | 70%    |                                                  | CuI gave substantial iodoatriazole adducts | 47    |
| 0.15 mM         | CuI.P(OEt) <sub>3</sub> (0.31)                  | -              | DIPEA (3)                          | DCM                                                        | rt     | Protected from light      | 42 h         | 83%    |                                                  |                                            | 48    |
| 0.3 mM          | CuSO <sub>4</sub> x 5 H <sub>2</sub> O (4.4)    | 4.4            | -                                  | H <sub>2</sub> O:tBuOH (2:1)                               | rt     |                           | Overnight    |        |                                                  |                                            | 49    |
| 1 mM            | Cu(MeCN) <sub>4</sub> [PF <sub>6</sub> ] (1.8)  | 2.1            | Tris-tri(methylazoly)l-amine (2.7) | 10 mM Na-Phosphate, pH 8                                   | rt     | Protected from light      | Overnight    |        |                                                  |                                            | 50    |
| 10 mM           | Cu(MeCN) <sub>4</sub> [PF <sub>6</sub> ] (0.05) | -              | TBTA (0.05)                        | DCM                                                        | 55 °C  |                           | 12 h         | 39-79% |                                                  |                                            | 51    |
| 0.8 mM          | CuSO <sub>4</sub> x 5 H <sub>2</sub> O (4)      | 6              | -                                  | H <sub>2</sub> O:tBuOH (1:1)                               | rt     |                           | Overnight    |        |                                                  |                                            | 36    |
| 10 mg/mL        | CuBr (0.01)                                     | -              | DBU (0.03)                         | DCM                                                        | rt     |                           | 6 h          |        |                                                  |                                            | 52    |
| 1 mM            | CuI (2)                                         | -              | DIPEA (2), 2,6-lutidine (2)        | MeCN                                                       | rt     | Ar, degassed              | 12 h         |        |                                                  |                                            | 53    |
| 0.5 mM          | CuSO <sub>4</sub> (1)                           | 5              | THTPA (1)                          | H <sub>2</sub> O:tBuOH (1:1) or H <sub>2</sub> O:TFE (1:1) | rt     |                           | < 1 h        | 13-51% |                                                  |                                            | 54    |
| 1 mg/mL         | CuSO <sub>4</sub> (1)                           | 1              | DIPEA (8)                          | H <sub>2</sub> O                                           | rt     | Degassed                  | 12 h         |        |                                                  |                                            | 22    |
| 0.1 mM          | Cu(MeCN) <sub>4</sub> [PF <sub>6</sub> ] (0.95) | -              |                                    | THF:MeOH (1:1)                                             | 40 °C  | Degassed                  | 20 h         | 64-83% |                                                  |                                            | 55    |
| 0.5 mM          | CuSO <sub>4</sub> (2)                           | 10             | THTPA (2)                          | DMF/H <sub>2</sub> O (2:1)                                 | rt     |                           | 5 min        |        |                                                  |                                            | 56,57 |
| 0.8 mg/mL       | CuSO <sub>4</sub> x 5 H <sub>2</sub> O (1)      | 3              | THTPA (1)                          | H <sub>2</sub> O:tBuOH (1:1)                               | rt     | N <sub>2</sub> , degassed |              | 52-92% | Diluted with H <sub>2</sub> O, lyophilised, HPLC |                                            | 58    |
| 1.5 mM          | CuSO <sub>4</sub> (10)                          | 10             | TBTA (10)                          | H <sub>2</sub> O:tBuOH (1:1)                               | rt     |                           | 12 h         |        | HPLC                                             |                                            | 59    |
| 0.91 mg/mL      | CuSO <sub>4</sub> x 5 H <sub>2</sub> O (1)      | 3              | THTPA (1)                          | H <sub>2</sub> O:tBuOH (1:1)                               | rt     | N <sub>2</sub>            | 16 h         |        |                                                  |                                            | 60    |
| 1 mg/mL         | CuSO <sub>4</sub> x 5 H <sub>2</sub> O (1)      | 3              | THTPA (1)                          | H <sub>2</sub> O:tBuOH (1:1)                               | rt     | N <sub>2</sub>            | 16 h         |        |                                                  |                                            | 61    |
|                 | CuSO <sub>4</sub> x 5 H <sub>2</sub> O (1)      | 3              | THTPA (1)                          | H <sub>2</sub> O:tBuOH (1:1)                               | rt     | N <sub>2</sub>            | 15 min - 2 h |        |                                                  |                                            | 62    |

|         |                                                             |    |                                       |                                         |        |                           |           |                     |                                                                    |                                                        |
|---------|-------------------------------------------------------------|----|---------------------------------------|-----------------------------------------|--------|---------------------------|-----------|---------------------|--------------------------------------------------------------------|--------------------------------------------------------|
|         | CuSO <sub>4</sub> x 5 H <sub>2</sub> O (1)                  | 3  | THTPA (1)                             | H <sub>2</sub> O:tBuOH (1:1)            | rt     | N <sub>2</sub> , degassed | 16 h      |                     |                                                                    | 63                                                     |
| 0.01 mM | CuSO <sub>4</sub> (4)                                       | 4  | -                                     | buffer pH 8 (250 mM Na borate, 1M NaCl) | 60 °C  |                           | 30 min    |                     |                                                                    | 64                                                     |
| 1 mM    | CuBr (0.8)                                                  | -  | -                                     | PhCH <sub>3</sub>                       | Reflux | Ar                        | Overnight | 43%                 | Celite filtration, DCM wash of filter, flash column chromatography | 65                                                     |
| 1.1 mM  | CuI.P(OEt) <sub>3</sub> (1.5)                               | -  | -                                     | DCM                                     | rt     | Protected from light      | 5 days    | 75%                 | Solvent removal, flash chromatography                              | 66                                                     |
| 1 mM    | Cu(MeCN) <sub>4</sub> [PF <sub>6</sub> ] <sub>2</sub> (1.5) | -  |                                       | PhCH <sub>3</sub> /MeOH (4:1)           | rt     | N <sub>2</sub>            | 24 h      | 0-46%               | Solvent removal, flash chromatography                              | Yield depended on chain length of employed azide<br>67 |
| 0.35 mM | CuSO <sub>4</sub> (2)                                       | 10 | THTPA (10)                            | H <sub>2</sub> O                        | 37 °C  | N <sub>2</sub>            | 3 h       | 45-55%              | Monitored by HPLC, purification by HPLC                            | 23                                                     |
| 1 mg/mL | CuSO <sub>4</sub> x 5 H <sub>2</sub> O (1)                  | 1  | DIPEA (8)                             | H <sub>2</sub> O                        | rt     | Ar, degassed              | Overnight | 7.5-12.8% (overall) | Lyophilisation, HPLC purification by HPLC                          | 68                                                     |
|         | CuSO <sub>4</sub> x 5 H <sub>2</sub> O (2)                  | 3  | THTPA (1) for some                    | H <sub>2</sub> O:tBuOH (1:1)            | rt     | N <sub>2</sub> , degassed | overnight |                     | SPE, HPLC purification                                             | 69                                                     |
| 2 mM    | CuSO <sub>4</sub> x 10 H <sub>2</sub> O (2.5)               | 10 |                                       | H <sub>2</sub> O:tBuOH (1:1.5)          |        |                           | overnight |                     | Removal tBuOH, filtration, HPLC purification                       | 70                                                     |
| 1 mM    | CuBr (0.2)                                                  | -  | DBU (3)                               | PhCH <sub>3</sub>                       | reflux | Ar, degassed              | 16 h      | 36-56%              | Celite filtration, DCM wash of filter, flash column chromatography | Head-to-tail, tetrapeptide<br>71                       |
| 0.2 mM  | CuI (2)                                                     | -  | TBTA (2), DIPEA (2), 2,6-lutidine (2) | MeCN                                    | rt     | Ar, degassed              | 48 h      |                     | Removed solvent, HPLC purification                                 | Head-to-tail, tetrapeptide<br>72                       |
| 1 mM    | CuI (0.33)                                                  | -  | DIPEA (3), 2,6-lutidine (2)           | MeCN:THF (4:1)                          | rt     | Degassed                  | 14 h      | 57-92%              | Filtration, removal of solvent, HPLC purification                  | Head-to-tail, pentapeptide<br>73                       |
|         | CuBr (1)                                                    | 1  | DIPEA (10), 2,6-lutidine (10)         | DMF:H <sub>2</sub> O                    | rt     |                           | 18 h      |                     | Washed with DMF, DCM                                               | 74                                                     |

**Supplementary Table S6:** Example reaction conditions used for on-resin CuAAC for peptides. TBTA = tris[(1-benzyl-1*H*-1,2,3-triazol-4-yl)methyl]amine, † = nominal concentration (resin loading/solvent volume), rt = room temperature.

| Substrate conc.† | Cu salt (eq)                                                  | Ascorbate (eq)       | Additives (eq)                         | Solvent                    | T  | Other conditions | Time      | Yield            | Workup                                                                      | Ref. |
|------------------|---------------------------------------------------------------|----------------------|----------------------------------------|----------------------------|----|------------------|-----------|------------------|-----------------------------------------------------------------------------|------|
| 15 µL/mg resin   | CuI (2)                                                       | -                    | DIPEA (50 eq)                          | THF                        |    |                  | 16 h      | 76%              |                                                                             | 75   |
| 625 mL/mmol      | CuI (0.5)                                                     | 1                    | 2,6-Lutidine (2 eq)                    | NMP/H <sub>2</sub> O (4:1) |    |                  | 48 - 96 h | 8.4%             |                                                                             | 76   |
| 20 mg/mL         | CuBr (1)                                                      | 1                    | 2,6-Lutidine (10 eq),<br>DIPEA (10 eq) | DMSO                       | rt | Degassed         | 16 h      |                  |                                                                             | 77   |
|                  | CuBr                                                          | yes                  | 2,6-Lutidine, DIPEA                    | DMF/MeCN                   | rt |                  | 8 h       | 22%<br>(overall) |                                                                             | 78   |
|                  | CuBr (1)                                                      | 3                    | 2,6-Lutidine (10 eq),<br>DIPEA (10 eq) | DMF/MeCN (10/3)            | rt | Degassed         | 6 h       | 20%-<br>75%      |                                                                             | 79   |
|                  | CuI (2)                                                       | 2                    | DIPEA (3)                              | DMF                        | rt |                  | Overnight |                  |                                                                             | 36   |
|                  | [Cu(CH <sub>3</sub> CN) <sub>4</sub> ] [PF <sub>6</sub> ] (1) | -                    | TBTA (1), DIPEA (2)                    | DMF                        |    |                  | 24 h      |                  |                                                                             | 80   |
|                  | CuI (1.5)                                                     | 7 (as ascorbic acid) | Piperidine (20 vol%)                   | DMF                        | rt | Light protected  | 15 h      |                  | Wash with 5% sodium diethyldithiocarbamate, 5% DIEPA in DMF, MeOH, DMF, NMP | 81   |

**Supplementary Table S7:** Example reaction conditions used for in solution RuAAC for peptides. cod = 1,5-cycloocatadien, rt = room temperature.

| Substrate conc. | Catalyst               | Catalyst loading | Solvent         | T      | Other conditions | Time   | Yield                                         | Workup                                                                                                                                                       | Comment                                                                                                 | Ref. |
|-----------------|------------------------|------------------|-----------------|--------|------------------|--------|-----------------------------------------------|--------------------------------------------------------------------------------------------------------------------------------------------------------------|---------------------------------------------------------------------------------------------------------|------|
| 1.9 mM          | [Cp*RuCl] <sub>4</sub> | 3.75%            | DMF             | 115 °C | µW (200 W)       | 30 min | 10%                                           | Removal of DMF in vacuo, extraction DCM/water, silica column chromatography followed by RP-8                                                                 | Desired product only minor, major product correct m/z, but no symmetry in NMR --> probably 1,4-analogue | 82   |
| 5 mM            | [Cp*RuCl] <sub>4</sub> | 30%              | THF/MeOH        | 50 °C  | -                | 24 h   | 40%                                           |                                                                                                                                                              |                                                                                                         | 83   |
| 5 mM            | [Cp*RuCl] <sub>4</sub> | 15%              | THF/MeOH (95:5) | 50 °C  | N <sub>2</sub>   | 24 h   | 14-68%                                        | Removal of solvent, flash chromatography                                                                                                                     |                                                                                                         | 84   |
| 3.1 mM          | Cp*RuCl(cod)           | 50%              | DMF             | 80 °C  | dry              | 18 h   | 3.4-7.0% (overall: SPPS, RuAAC, deprotection) | Addition of DCM, washed organic phase with H <sub>2</sub> O+0.05% TFA, removal of solvent, redissolved in H <sub>2</sub> O/MeCN (1:1)+0.05% TFA, lyophilised | Sidechain protected peptide                                                                             | 85   |

**Supplementary Table S8:** Example reaction conditions used for on-resin solution RuAAC for peptides. † = nominal concentration (resin loading/solvent volume), cod = 1,5-cycloocatadien

| Substrate conc. † | Catalyst                                | Catalyst loading | Solvent | T     | Other conditions          | Time  | Yield          | Workup                                                     | Ref. |
|-------------------|-----------------------------------------|------------------|---------|-------|---------------------------|-------|----------------|------------------------------------------------------------|------|
| 200 mM            | Cp*RuCl(cod)                            | 3.75%            | DMF     | 60 °C | Dry, degassed, Ar         | 6 h   |                | Wash with DMF, MeOH, DCM                                   | 22   |
| < 12.5 mM         | Cp*RuCl(cod)                            | 30%              | DMF     | 60 °C | μW (30 W)                 | 5 h   | 2.1% (overall) | Wash with MeOH, 0.5% diethylthiocarbamate in DMF, DMF, DCM | 68   |
| 25 mM             | Cp*RuCl(cod)                            | 15%              | DMF     | 70 °C | Dry, degassed             | 1 h   | 8-21%          | Monitored by IR, continued with Fmoc-deprotection          | 86   |
|                   | Cp*RuCl(cod)                            | 50%              | DMF     | 60 °C | μW (30 W), N <sub>2</sub> | 3 h   |                | Wash with MeOH, 2% diethylthiocarbamate in DMF, DMF        | 69   |
| 75 mM             | Cp*RuCl(PPh <sub>3</sub> ) <sub>2</sub> |                  | DMF     | 65 °C | μW, degassed, Ar          | 2.5 h |                | Wash with DMF, Et <sub>2</sub> O                           | 70   |

- 1 R. Fasan, R. L. A. Dias, K. Moehle, O. Zerbe, J. W. Vrijbloed, D. Obrecht and J. A. Robinson, *Angew. Chemie - Int. Ed.*, 2004, **43**, 2109–2112.
- 2 N. E. Shepherd, H. N. Hoang, G. Abbenante and D. P. Fairlie, *J. Am. Chem. Soc.*, 2005, **127**, 2974–2983.
- 3 R. J. Clark, H. Fischer, L. Dempster, N. L. Daly, K. J. Rosengren, S. T. Nevin, F. A. Meunier, D. J. Adams and D. J. Craik, *Proc. Natl. Acad. Sci. U. S. A.*, 2005, **102**, 13767–13772.
- 4 A. Zipperer, M. C. Konnerth, C. Laux, A. Berscheid, D. Janek, C. Weidenmaier, M. Burian, N. A. Schilling, C. Slavetinsky, M. Marschal, M. Willmann, H. Kalbacher, B. Schitteck, H. Brötz-Oesterhelt, S. Grond, A. Peschel and B. Krismer, *Nature*, 2016, **535**, 511–516.
- 5 H. Y. Lam, Y. Zhang, H. Liu, J. Xu, C. T. T. Wong, C. Xu and X. Li, *J. Am. Chem. Soc.*, 2013, **135**, 6272–6279.
- 6 W. Lian, P. Upadhyaya, C. A. Rhodes, Y. Liu and D. Pei, *J. Am. Chem. Soc.*, 2013, **135**, 11990–11995.
- 7 J. M. Smith, J. R. Frost and R. Fasan, *Chem. Commun.*, 2014, **50**, 5027–5030.
- 8 A. M. Leduc, J. O. Trent, J. L. Wittliff, K. S. Bramlett, S. L. Briggs, N. Y. Chirgadze, Y. Wang, T. P. Burris and A. F. Spatola, *Proc. Natl. Acad. Sci. U. S. A.*, 2003, **100**, 11273–11278.
- 9 S. Lindman, G. Lindeberg, P. A. Frändberg, F. Nyberg, A. Karlén and A. Hallberg, *Bioorganic Med. Chem.*, 2003, **11**, 2947–2954.
- 10 C. M. B. Kourra and N. Cramer, *Chem Sci*, 2016, **7**, 7007–7012.
- 11 N. Zheng, P. Karra, M. A. Vandenberg, J. H. Kim, M. J. Webber, W. L. Holland and D. H.-C. Chou, *J. Med. Chem.*, 2019, **62**, 11437–11443.
- 12 A. Muppidi, Z. Wang, X. Li, J. Chen and Q. Lin, *Chem. Commun.*, 2011, **47**, 9396–9398.
- 13 S. Kneissl, E. J. Loveridge, C. Williams, M. P. Crump and R. K. Allemann, *Chembiochem*, 2008, **9**, 3046–3054.
- 14 J. Tang, Y. He, H. Chen, W. Sheng and H. Wang, *Chem. Sci.*, 2017, **8**, 4565–4570.
- 15 J. M. Song, E. E. Gallagher, A. Menon, L. D. Mishra and A. L. Garner, *Org. Biomol. Chem.*, 2019, **17**, 6414–6419.
- 16 D. Wang, W. Liao and P. S. Arora, *Angew. Chemie - Int. Ed.*, 2005, **44**, 6525–6529.
- 17 Y. S. Chang, B. Graves, V. Guerlavais, C. Tovar, K. Packman, K. H. To, K. A. Olson, K. Kesavan, P. Gangurde, A. Mukherjee, T. Baker, K. Darlak, C. Elkin, Z. Filipovic, F. Z. Qureshi, H. Cai, P. Berry, E. Feyfant, X. E. Shi, J. Horstick, D. A. Annis, A. M. Manning, N. Fotouhi, H. Nash, L. T. Vassilev and T. K. Sawyer, *Proc. Natl. Acad. Sci. U. S. A.*, 2013, **110**, E3445–E3454.
- 18 B. Van Lierop, S. Chee Ong, A. Belgi, C. Delaine, S. Andrikopoulos, N. L. Haworth, J. G. Menting, M. C. Lawrence, A. J. Robinson and B. E. Forbes, *Sci. Rep.*, 2017, **7**, 1–13.
- 19 P. M. Cromm, S. Schaubach, J. Spiegel, A. Fürstner, T. N. Grossmann and H. Waldmann, *Nat. Commun.*, 2016, **7**, 11300.
- 20 S. A. Kawamoto, A. Coleska, X. Ran, H. Yi, C. Y. Yang and S. Wang, *J. Med. Chem.*, 2012, **55**, 1137–1146.
- 21 A. Gori, C. I. A. Wang, P. J. Harvey, K. J. Rosengren, R. F. Bholra, M. L. Gelmi, R. Longhi, M. J. Christie, R. J. Lewis, P. F. Alewood and A. Brust, *Angew. Chemie - Int. Ed.*, 2015, **54**, 1361–1364.
- 22 S. Pacifico, A. Kerckhoffs, A. J. Fallow, R. E. Foreman, R. Guerrini, J. McDonald, D. G. Lambert and A. G. Jamieson, *Org. Biomol. Chem*, 2017, **15**, 4704–4710.
- 23 A. M. White, S. J. de Veer, G. Wu, P. J. Harvey, K. Yap, G. J. King, J. E. Swedberg, C. K. Wang, R. H. P. Law, T. Durek and D. J. Craik, *Angew. Chemie - Int. Ed.*, 2020, **59**, 11273–11277.
- 24 H. E. Blackwell and R. H. Grubbs, *Angew. Chemie Int. Ed.*, 1998, **37**, 3281–3284.
- 25 M. Poirier, N. Aubry, C. Boucher, J.-M. Ferland, S. Laplante and Y. S. Tsantrizos, *J. Org. Chem.*, 2005, **70**, 10765–10773.
- 26 N. K. Yee, V. Farina, I. N. Houpis, N. Haddad, R. P. Frutos, F. Gallou, X.-J. Wang, X. Wei, R. D. Simpson, X. Feng, V. Fuchs, Y. Xu, J. Tan, L. Zhang, J. Xu, L. L. Smith-Keenan, J. Vitous, M. D.

Ridges, E. M. Spinelli, M. Johnson, K. Donsbach, T. Nicola, M. Brenner, E. Winter, P. Kreye and W. Samstag, *J. Org. Chem.*, 2006, **71**, 7133–7145.

27 H. T. Ten Brink, D. T. S. Rijkers and R. M. J. Liskamp, *J. Org. Chem.*, 2006, **71**, 1817–1824.

28 M. N. Islam, M. S. Islam, M. A. Hoque, T. Kato, N. Nishino, A. Ito and M. Yoshida, *Bioorganic Med. Chem.*, 2014, **22**, 3862–3870.

29 S. Jiang, P. Li, S.-L. Lee, C. Y. Lin, Y.-Q. Long, M. D. Johnson, R. B. Dickson and P. P. Roller, *Org. Lett.*, 2007, **9**, 9–12.

30 Ø. Jacobsen, J. Klaveness, O. Petter Ottersen, M. Reza Amiry-Moghaddam and P. Rongved, *Org. Biomol. Chem.*, 2009, **7**, 1599–1611.

31 Y. E. Bergman, M. P. Del Borgo, R. D. Gopalan, S. Jalal, S. E. Unabia, M. Ciampini, D. J. Clayton, J. M. Fletcher, R. J. Mulder, J. A. Wilce, M. I. Aguilar and P. Perlmutter, *Org. Lett.*, 2009, **11**, 4438–4440.

32 M. P. C. Mulder, J. A. W. Kruijtzter, E. J. Breukink, J. Kemmink, R. J. Pieters and R. M. J. Liskamp, *Bioorganic Med. Chem.*, 2011, **19**, 6505–6517.

33 P. Martín-Gago, R. Ramón, E. Aragón, J. Fernández-Carneado, P. Martín-Malpartida, X. Verdaguer, P. López-Ruiz, B. Colás, M. A. Cortes, B. Ponsati, M. J. Macias and A. Riera, *Bioorganic Med. Chem. Lett.*, 2014, **24**, 103–107.

34 Z. Amso, R. Kowalczyk, Y.-E. Park, M. Watson, J.-M. Lin, D. S. Musson, J. Cornish and M. A. Brimble, *Org. Biomol. Chem.*, 2016, **14**, 6231–6243.

35 F. J. Dekker, N. J. De Mol, M. J. E. Fischer, J. Kemmink and R. M. J. Liskamp, *Org. Biomol. Chem.*, 2003, **1**, 3297–3303.

36 L. Frankiewicz, C. Betti, K. Guillemyn, D. Tourwé, Y. Jacquot and S. Ballet, *J. Pept. Sci.*, 2013, **19**, 423–432.

37 R. J. Platt, T. S. Han, B. R. Green, M. D. Smith, J. Skalicky, P. Gruszczynski, H. S. White, B. Olivera, G. Bulaj and J. Gajewiak, *J. Biol. Chem.*, 2012, **287**, 20727–20736.

38 B. Van Lierop, S. Chee Ong, A. Belgi, C. Delaine, S. Andrikopoulos, N. L. Haworth, J. G. Menting, M. C. Lawrence, A. J. Robinson and B. E. Forbes, *Sci. Rep.*, 2017, **7**, 17239.

39 C. A. MacRaid, J. Illesinghe, B. J. Van Lierop, A. L. Townsend, M. Chebib, B. G. Livett, A. J. Robinson and R. S. Norton, *J. Med. Chem.*, 2009, **52**, 755–762.

40 S. Chhabra, A. Belgi, P. Bartels, B. J. van Lierop, S. D. Robinson, S. N. Kompella, A. Hung, B. P. Callaghan, D. J. Adams, A. J. Robinson and R. S. Norton, *J. Med. Chem.*, 2014, **57**, 9933–9944.

41 R. Kowalczyk, S. H. Yang, M. A. Brimble, K. E. Callon, M. Watson, Y. E. Park and J. Cornish, *Bioorganic Med. Chem.*, 2014, **22**, 3565–3572.

42 M. Horn, F. Reichart, S. Natividad-Tietz, D. Diaz and I. Neundorf, *Chem. Commun.*, 2016, **52**, 2261–2264.

43 P. M. Weerawarna, Y. Kim, A. C. Galasiti Kankanamalage, V. C. Damalanka, G. H. Lushington, K. R. Alliston, N. Mehzabeen, K. P. Battaile, S. Lovell, K.-O. Chang and W. C. Groutas, *Eur. J. Med. Chem.*, 2016, **119**, 300–318.

44 A. L. C. Isaad, A. M. Papini, M. Chorev and P. Rovero, *J. Pept. Sci.*, 2009, **15**, 451–454.

45 V. Celentano, D. Diana, C. Di Salvo, L. De Rosa, A. Romanelli, R. Fattorusso and L. D. D’Andrea, *Chem. – A Eur. J.*, 2016, **22**, 5534–5537.

46 C. Testa, M. Scrima, M. Grimaldi, A. M. D’Ursi, M. L. Dirain, N. Lubin-Germain, A. Singh, C. Haskell-Luevano, M. Chorev, P. Rovero and A. M. Papini, *J. Med. Chem.*, 2014, **57**, 9424–9434.

47 V. D. Bock, R. Perciaccante, T. P. Jansen, H. Hiemstra and J. H. Van Maarseveen, *Org. Lett.*, 2006, **8**, 919–922.

48 Ø. Jacobsen, H. Maekawa, N.-H. Ge, C. H. G€ Orbitz, P. P. Rongved, O. P. Ottersen, M. Amiry-Moghaddam and J. Klaveness, *J. Org. Chem.*, 2011, **76**, 1228–1238.

49 S. Cantel, A. Le, C. Isaad, M. Scrima, J. J. Levy, R. D. Dimarchi, P. Rovero, J. A. Halperin, A. Maria D’ursi, A. M. Papini and M. Chorev, *J. Org. Chem.*, 2008, **73**, 5663–5674.

50 J. H. Park and M. L. Waters, *Org. Biomol. Chem.*, 2013, **11**, 69–77.

51 G. Chouhan and K. James, *Org. Lett.*, 2013, **15**, 1206–1209.

52 Y. Liu, L. Zhang, J. Wan, Y. Li, Y. Xu and Y. Pan, *Tetrahedron*, 2008, **64**, 10728–10734.

53 J. H. Van Maarseveen, W. S. Horne and M. R. Ghadiri, *Org. Lett.*, 2005, **7**, 4503–4506.

54 P. T. Tran, C. Ø. Larsen, T. Røndbjerg, M. De Foresta, M. B. A. Kunze, A. Marek, J. H. Løper, L.-E. Boyhus, A. Knuhtsen, K. Lindorff-Larsen and D. S. Pedersen, *Chem. – A Eur. J.*, 2017, **23**, 3490–3495.

55 M. Strack, É. Billard, D. Chatenet and W. D. Lubell, *Bioorganic Med. Chem. Lett.*, 2017, **27**, 3412–3416.

56 G. J. J. Richelle, S. Ori, H. Hiemstra, J. H. van Maarseveen and P. Timmerman, *Angew. Chemie - Int. Ed.*, 2018, **57**, 501–505.

57 G. J. J. Richelle, M. Schmidt, H. Ippel, T. M. Hackeng, J. H. van Maarseveen, T. Nuijens and P. Timmerman, *ChemBioChem*, 2018, **19**, 1934–1938.

58 J. Iegre, P. Brear, D. J. Baker, Y. S. Tan, E. L. Atkinson, H. F. Sore, D. H. O’ Donovan, C. S. Verma, M. Hyvönen, H. Hyvönen and D. R. Spring, *Chem. Sci.*, 2019, **10**, 5056–5063.

59 L. Zhang, T. Navaratna, J. Liao and G. M. Thurber, *Bioconjug. Chem.*, 2015, **26**, 329–337.

60 M. M. Wiedmann, Y. S. Tan, Y. Wu, S. Aibara, W. Xu, H. F. Sore, C. S. Verma, L. Itzhaki, M. Stewart, J. D. Brenton and D. R. Spring, *Angew. Chemie - Int. Ed.*, 2017, **56**, 524–529.

61 Y. H. Lau, P. De Andrade, S.-T. Quah, M. Rossmann, L. Laraia, N. Sköld, S. Sköld, T. J. Sum, P. J. E. Rowling, T. L. Joseph, C. Verma, M. Hyvönen, H. Hyvönen, L. S. Itzhaki, A. R. Venkitaraman, C. J. Brown, D. P. Lane and D. R. Spring, *Chem. Sci.*, 2014, **5**, 1804–1809.

62 J. Iegre, N. S. Ahmed, J. S. Gaynord, Y. Wu, K. M. Herlihy, Y. S. Tan, M. E. Lopes-Pires, R. Jha, Y. H. Lau, H. F. Sore, C. Verma, D. H. O' Donovan, N. Pugh and D. R. Spring, *Chem. Sci.*, 2018, **9**, 4638–4643.

63 W. Xu, Y. H. Lau, G. Fischer, Y. S. Tan, A. Chattopadhyay, M. De La Roche, M. Hyvö, C. Verma, D. R. Spring and L. S. Itzhaki, *J. Am. Chem. Soc.*, 2017, **139**, 2245–2256.

64 Y. Onda, G. Bassi, A. Elsayed, F. Ulrich, S. Oehler, L. Plais, J. Scheuermann and D. Neri, *Chem. – A Eur. J.*, , DOI:10.1002/chem.202005423.

65 Q. Luo, Y. Tao, W. Sheng, J. Lu and H. Wang, *Nat. Commun.*, 2019, **10**, 1–9.

66 F. Tahoori, S. Balalaie, R. Sheikhejad, M. Sadjadi and P. Boloori, *Amino Acids*, 2014, **46**, 1033–1046.

67 J. Zhang, J. Kemmink, D. T. S. Rijkers and R. M. J. Liskamp, *Org. Lett.*, 2011, **13**, 3438–3441.

68 M. Empting, O. Avrutina, R. Meusinger, S. Fabritz, M. Reinwarth, M. Biesalski, S. Voigt, G. Buntkowsky and H. Kolmar, *Angew. Chemie - Int. Ed.*, 2011, **50**, 5207–5211.

69 S. R. Tala, A. Singh, C. J. Lensing, S. M. Schnell, K. T. Freeman, J. R. Rocca and C. Haskell-Luevano, *ACS Chem. Neurosci.*, 2017, **9**, 1001–1013.

70 S. Tomassi, A. M. Trotta, C. Ieranò, F. Merlino, A. Messere, G. Rea, F. Santoro, D. Brancaccio, A. Carotenuto, V. M. D'Amore, F. S. Di Leva, E. Novellino, S. Cosconati, L. Marinelli, S. Scala and S. Di Maro, *Chem. - A Eur. J.*, 2020, **26**, 10113–10125.

71 V. D. Bock, D. Speijer, H. Hiemstra and J. H. Van Maarseveen, *Org. Biomol. Chem.*, 2007, **5**, 971–975.

72 W. S. Horne, C. A. Olsen, J. M. Beierle, A. Montero and M. R. Ghadiri, *Angew. Chemie - Int. Ed.*, 2009, **48**, 4718–4724.

73 T. S. Hu, R. Tannert, H. D. Arndt and H. Waldmann, *Chem. Commun.*, 2007, 3942–3944.

74 C. Testa, D. D'addona, M. Scrima, A. M. Tedeschi, A. M. D'ursi, C. Bernhard, F. Denat, C. Bello, P. Rovero, M. Chorev and A. M. Papini, *Pept. Sci.*, , DOI:10.1002/pep2.24071.

75 M. Roice, I. Johannsen and M. Meldal, *QSAR Comb. Sci.*, 2004, **23**, 662–673.

76 V. Goncalves, B. Gautier, A. Regazzetti, P. Coric, S. Bouaziz, C. Garbay, M. Vidal and N. Inguibert, *Bioorg. Med. Chem. Lett.*, 2007, **17**, 5590–5594.

77 S. Ingale and P. E. Dawson, *Org. Lett.*, 2011, **13**, 2822–2825.

78 B. B. Metaferia, M. Rittler, J. S. Gheeya, A. Lee, H. Hempel, A. Plaza, W. G. Stetler-Stevenson, C. A. Bewley and J. Khan, *Bioorganic Med. Chem. Lett.*, 2010, **20**, 7337–7340.

79 R. A. Turner, A. G. Oliver and R. S. Lokey, *Org. Lett.*, 2007, **9**, 5011–5014.

80 C. Ngambenjawong, J. M. B. Pineda and S. H. Pun, *Bioconjug. Chem.*, 2016, **27**, 2854–2862.

81 R. Kandler, S. Das and A. Nag, *RSC Adv.*, 2021, **11**, 4842–4852.

82 M. R. Krause, R. Goddard and S. Kubik, *J. Org. Chem.*, 2011, **76**, 7084–7095.

83 Y. Zhang, C. Xu, H. Y. Lam, C. L. Lee and X. Li, *Proc. Natl. Acad. Sci. U. S. A.*, 2013, **110**, 6657–6662.

84 W. Wu, Z. Zhang and L. S. Liebeskind, *J. Am. Chem. Soc.*, 2011, **133**, 14256–14259.

85 C. J. White and A. K. Yudin, *Nat. Chem.*, 2011, **3**, 509–524.

86 A. Knuhtsen, C. Whitmore, F. S. Mcwhinnie, L. Mcdougall, R. Whiting, B. O. Smith, C. M. Timperley, A. C. Green, K. I. Kinnear and A. G. Jamieson, *Chem. Sci.*, 2019, **10**, 1671–1676.
